# Supplementary material for: Feature Distributions of Technologies
Source: Preprints.org preprint supplement (doi:10.20944/preprints202406.1235.v1), 2024-06-18
Supplement: Supplementary file 1 [file supplementary]

## **Supplementary Materials for Feature Distributions of Technologies**

*Supplementary Contents: Information about Candidate Technologies*

**Table I.** All the 470 candidate technologies along with their origins and contents, corresponding keywords that were obtained through comparison of search query volumes of the candidate keywords derived from the root keyword and a co-occurrence analysis for multiple keywords, and technologies included or excluded in the analysis of distribution and evolution. It should be noted that most of the technological contents are presented in their original languages, i.e., English, Russian and Chinese.

| No.                                         | Content                                                                                                                                                                                                                                                                                                                                                                                                                                                 | Keyword                        | Included |
|---------------------------------------------|---------------------------------------------------------------------------------------------------------------------------------------------------------------------------------------------------------------------------------------------------------------------------------------------------------------------------------------------------------------------------------------------------------------------------------------------------------|--------------------------------|----------|
| <b>Government: United States of America</b> |                                                                                                                                                                                                                                                                                                                                                                                                                                                         |                                |          |
| <b>Plan 1: National Robotics Initiative</b> |                                                                                                                                                                                                                                                                                                                                                                                                                                                         |                                |          |
| 1                                           | Autonomy: principles, computational methods, and architectures for enhancing intelligent perception and decision making by single agents and teams of agents in unstructured environments; examples include human interaction with unmanned systems for supervision, collaborative control, and peer-to-peer collaboration.                                                                                                                             | perception and decision making | Y        |
| 2                                           | Social, Behavioral, and Economic: research to understand long-term social, behavioral, and economic implications of co-robots across all areas of human activity, including uptake, diffusion, and use among different demographic and social groups, including appropriate incentives and potential disparities and ethical implications; workforce participation among various diverse groups, including the elderly and non-native English speakers. | co-robots                      | Y        |
| 3                                           | Sensing and Perception: sensor/biosensor systems and networks                                                                                                                                                                                                                                                                                                                                                                                           | biosensor                      | Y        |
| 4                                           | Sensing and Perception: object perception in clutter and various lighting conditions                                                                                                                                                                                                                                                                                                                                                                    | object perception              | Y        |
| 5                                           | Sensing and Perception: sensors capable of discriminative monitoring of multiple agents like chemical and biological threat agents, biomarkers and metabolites, and plant pathogens                                                                                                                                                                                                                                                                     | discriminative                 | Y        |
| 6                                           | Sensing and Perception: enhanced immersive interfaces using multi-model displays                                                                                                                                                                                                                                                                                                                                                                        | multi-model displays           | Y        |
| 7                                           | Sensing and Perception: real-time estimation of human physical and emotional state                                                                                                                                                                                                                                                                                                                                                                      | estimation                     | Y        |
| 8                                           | Sensing and Perception: real-time prediction of human intent                                                                                                                                                                                                                                                                                                                                                                                            | prediction                     | Y        |
| 9                                           | Sensing and Perception: methods for object recognition and human activity monitoring                                                                                                                                                                                                                                                                                                                                                                    | recognition monitoring         | Y        |
| 10                                          | Modeling and Analysis: models of physical human–robot interactions for collaborative tasks                                                                                                                                                                                                                                                                                                                                                              | interactions for collaborative | Y        |

| <b>No.</b> | <b>Content</b>                                                                                                                          | <b>Keyword</b>                                 | <b>Included</b> |
|------------|-----------------------------------------------------------------------------------------------------------------------------------------|------------------------------------------------|-----------------|
|            | (e.g., assembly) and associated performance metrics; verifiable simulation models and benchmarking                                      | tasks                                          |                 |
| 11         | Modeling and Analysis: verifiable simulation models and benchmarking                                                                    | simulation<br>benchmarking                     | Y               |
| 12         | Modeling and Analysis: engineering and human factor models of dynamic interactive human–robot teams                                     | engineering<br>human factors                   | Y               |
| 13         | Modeling and Analysis: models of multi-modal interfaces and operator skill development                                                  | interfaces<br>operator                         | Y               |
| 14         | Modeling and Analysis: formal models that support task execution with success guarantees for human–robot systems                        | formal models                                  | Y               |
| 15         | Modeling and Analysis: new geometric and physical models that capture uncertainty and allow efficient construction of robust task plans | geometric<br>physical models                   | Y               |
| 16         | Modeling and Analysis: social, behavioral, and economic models to support analysis and prediction of long-term impacts of co-robots     | impacts of co-robots                           | Y               |
| 17         | Design and Materials: physical co-robot designs that enhance the safety and comfort of the human during collaborative task execution    | safety comfort                                 | Y               |
| 18         | Design and Materials: compliant actuation methods                                                                                       | compliant<br>actuation                         | Y               |
| 19         | Design and Materials: novel approaches and mechanisms for actuation and robot mobility                                                  | actuation<br>mobility                          | Y               |
| 20         | Design and Materials: soft structures with embedded power, actuation, sensing, and computation                                          | structures<br>computation                      | Y               |
| 21         | Design and Materials: system-level design and engineering                                                                               | System level                                   | Y               |
| 22         | Design and Materials: optimization of kinematic and dynamic properties of co-robots                                                     | kinematic<br>dynamic                           | Y               |
| 23         | Design and Materials: miniaturization of sensors and robots                                                                             | miniaturization                                | Y               |
| 24         | Design and Materials: manufacturability, cost, and life cycle analysis                                                                  | manufacturability<br>cost life cycle           | Y               |
| 25         | Design and Materials: wearable robots and smart clothing capable of biometric monitoring and first aid                                  | wearable and<br>smart clothing                 | Y               |
| 26         | Communication and Interfaces: research in human cognition, communication, and natural language processing                               | cognition<br>communication<br>natural language | Y               |

| <b>No.</b> | <b>Content</b>                                                                                                                                                                               | <b>Keyword</b>                                                       | <b>Included</b> |
|------------|----------------------------------------------------------------------------------------------------------------------------------------------------------------------------------------------|----------------------------------------------------------------------|-----------------|
|            |                                                                                                                                                                                              | processing                                                           |                 |
| 27         | Communication and Interfaces: language understanding and production, communication through physical contact and brain-machine interfaces                                                     | language<br>communication                                            | Y               |
| 28         | Communication and Interfaces: computational algorithms and architectures for analyzing, understanding, and generating speech and other communicative forms like gestures and haptic displays | algorithms                                                           | Y               |
| 29         | Planning and Control: motion or task planning methods with success guarantees                                                                                                                | guarantees                                                           | Y               |
| 30         | Planning and Control: provably correct planning methods                                                                                                                                      | planning                                                             | Y               |
| 31         | Planning and Control: models and algorithms to efficiently represent the structure of search spaces to speed planning                                                                        | structure of<br>search spaces                                        | Y               |
| 32         | Planning and Control: generation of legible motions                                                                                                                                          | motions                                                              | Y               |
| 33         | Planning and Control: optimal control of hybrid systems including human-robot systems                                                                                                        | hybrid                                                               | Y               |
| 34         | Planning and Control: real-time planning with kinematic and dynamic models                                                                                                                   | kinematic and<br>dynamic models                                      | Y               |
| 35         | Planning and Control: human-guided planning                                                                                                                                                  | human-guided                                                         | Y               |
| 36         | Planning and Control: fault-tolerant planning                                                                                                                                                | fault-tolerant                                                       | Y               |
| 37         | Planning and Control: real-time fault diagnosis and replanning                                                                                                                               | diagnosis<br>replanning<br>continuous                                | Y               |
| 38         | Planning and Control: continuous calibration and adaptation of kinematic and dynamic models                                                                                                  | calibration and<br>adaptation of<br>kinematic and<br>dynamic models  | Y               |
| 39         | Planning and Control: formal methods for planning                                                                                                                                            | formal methods<br>for planning                                       | Y               |
| 40         | Planning and Control: stability of hybrid local-central controllers like both that arise in exoskeletons and smart prosthetics                                                               | stability of<br>hybrid local-<br>central<br>controllers<br>mimicking | Y               |
| 41         | Planning and Control: controllers that mimic human learning, reasoning, and action planning                                                                                                  | human learning<br>reasoning and<br>action planning                   | Y               |
| 42         | Artificial Intelligence: mechanisms of human                                                                                                                                                 | reasoning and                                                        | Y               |

| <b>No.</b> | <b>Content</b>                                                                                                                                                                     | <b>Keyword</b>                                                               | <b>Included</b> |
|------------|------------------------------------------------------------------------------------------------------------------------------------------------------------------------------------|------------------------------------------------------------------------------|-----------------|
|            | reasoning and action planning                                                                                                                                                      | action planning<br>integrated                                                |                 |
| 43         | Artificial Intelligence: problem-solving architectures that integrate reasoning, perceptual, motor, and natural language capabilities                                              | reasoning,<br>perceptual,<br>motor, and<br>natural language<br>cognition and | Y               |
| 44         | Artificial Intelligence: models of human cognition and acquisition of contextual knowledge                                                                                         | acquisition of<br>contextual<br>knowledge                                    | Y               |
| 45         | Artificial Intelligence: systems that integrate robotic and artificial intelligence planning with learning and navigation for human–robot teams                                    | learning and<br>navigation                                                   | Y               |
| 46         | Artificial Intelligence: research in specialties supporting the expansion of robot capabilities like multi-agent systems, human and machine cognition, and developmental science   | expansion of<br>capabilities                                                 | Y               |
| 47         | Artificial Intelligence: knowledge representation                                                                                                                                  | knowledge<br>representation                                                  | Y               |
| 48         | Cognition and Learning: machine cognition and cognitive prediction                                                                                                                 | cognition<br>prediction                                                      | Y               |
| 49         | Cognition and Learning: models of human or animal cognition                                                                                                                        | human or<br>animal<br>cognition                                              | Y               |
| 50         | Cognition and Learning: cognitive prostheses that extend human cognitive capabilities                                                                                              | cognitive<br>prostheses                                                      | Y               |
| 51         | Cognition and Learning: shared mental models for human–robot teams                                                                                                                 | shared mental                                                                | Y               |
| 52         | Cognition and Learning: systems that learn from personal experience or from other robots’ experiences                                                                              | learn experience                                                             | Y               |
| 53         | Cognition and Learning: cognitive prostheses                                                                                                                                       | cognitive                                                                    | Y               |
| 54         | Cognition and Learning: hybrid architectures that integrate different methods like deductive, probabilistic, case-based, and symbolic reasoning                                    | integrate                                                                    | Y               |
| 55         | Algorithms and Hardware: design of data structures, algorithms, and computing hardware including GPUs and FPGAs for all topics above to achieve real-time, interactive performance | data structures,<br>algorithms, and<br>computing<br>hardware                 | Y               |
| 56         | Algorithms and Hardware: methods that support scaling up of problem sizes; for example, a single operator controls very large teams of robots                                      | scaling up of<br>problem sizes                                               | Y               |
| 57         | Application-Inspired: new types of sensors needed                                                                                                                                  | new types of                                                                 | Y               |

| No.                                                          | Content                                                                                                                                                                                                                                                                                                                                                                                                                          | Keyword                                         | Included |
|--------------------------------------------------------------|----------------------------------------------------------------------------------------------------------------------------------------------------------------------------------------------------------------------------------------------------------------------------------------------------------------------------------------------------------------------------------------------------------------------------------|-------------------------------------------------|----------|
|                                                              | for new types of applications                                                                                                                                                                                                                                                                                                                                                                                                    | applications                                    |          |
| 58                                                           | Application-Inspired: research topics peculiar to healthcare, marine, surveillance, mining, household, agriculture, and nano-robots                                                                                                                                                                                                                                                                                              | healthcare                                      | Y        |
| 59                                                           | Application-Inspired: neural interfaces, signal processing, and control methods for intelligent prosthetic devices                                                                                                                                                                                                                                                                                                               | prosthetic                                      | Y        |
| 60                                                           | Platform-Specific: issues peculiar to specific platforms and operating domains including micro- and nano-robots, humanoid robots, networked multi-robot teams, Robot Operating Systems, exoskeletons, prosthetic devices, households                                                                                                                                                                                             | specific platforms                              | Y        |
| 61                                                           | Platform-Specific: assembly lines                                                                                                                                                                                                                                                                                                                                                                                                | assembly lines                                  | Y        |
| 62                                                           | Assistive Technologies: enabling humans to amplify or compensate for their capabilities, with systems that interpret their intent, make context-based decisions, and allow people to operate beyond their diminished or normal physical, cognitive, or sensory capabilities, including prosthetics and exo-skeletal augmentation                                                                                                 | intent interpretation                           | Y        |
| 63                                                           | Assistive Technologies: methods to use new environmental monitoring technologies and make decisions to improve human quality of life                                                                                                                                                                                                                                                                                             | environmental monitoring                        | Y        |
| 64                                                           | STEM Education: Research on robotic technologies that will enable the development of interactive and adaptive learning environments for learners of all ages, across all domains; and preparation of the next generation of researchers to confront new challenges in data-enabled robotic technologies and science (e.g., co-robot systems that support experimental workflow design, data ubiquity, and personalized learning) | interactive and adaptive learning environments  | Y        |
| <b>Plan 2: National Network for Manufacturing Innovation</b> |                                                                                                                                                                                                                                                                                                                                                                                                                                  |                                                 |          |
| 65                                                           | Assistive and soft robotics: military units: Robots carrying heavy payloads over uneven terrain                                                                                                                                                                                                                                                                                                                                  | payloads                                        | Y        |
| 66                                                           | Assistive and soft robotics: military units: Automated materials handling of sensitive spare parts                                                                                                                                                                                                                                                                                                                               | automated materials                             | Y        |
| 67                                                           | Assistive and soft robotics: Soft Robotic Commercial applications: Prosthetics, surgery, assistance to the elderly                                                                                                                                                                                                                                                                                                               | prosthetics, surgery, assistance to the elderly | Y        |

| No.                                                                           | Content                                                                                                                                            | Keyword                                                    | Included |
|-------------------------------------------------------------------------------|----------------------------------------------------------------------------------------------------------------------------------------------------|------------------------------------------------------------|----------|
| 68                                                                            | Assistive and soft robotics: Soft Robotic Commercial applications: Simulation and modeling                                                         | simulation and modeling                                    | Y        |
| 69                                                                            | Assistive and soft robotics: Soft Robotic Commercial applications: Food inspection, food processing, and picking and placing food items            | food inspection, food processing, picking and placing food | Y        |
| <b>Plan 3: NASA Technology Roadmaps TA 4: Robotics and Autonomous Systems</b> |                                                                                                                                                    |                                                            |          |
| 70                                                                            | Robotics and Autonomous System: Sensing and Perception: 3D Sensing: 3D Range Imaging Sensors for Surface Mobility                                  | surface Mobility                                           | Y        |
| 71                                                                            | Robotics and Autonomous System: Sensing and Perception: 3D Sensing: 3D Range Imaging Sensors for Above-Surface Mobility                            | above-Surface mobility                                     | Y        |
| 72                                                                            | Robotics and Autonomous System: Sensing and Perception: 3D Sensing: 5D Range Imaging Sensors for Manipulation                                      | 3D range imaging for manipulation                          | Y        |
| 73                                                                            | Robotics and Autonomous System: Sensing and Perception: 3D Sensing: In Situ Camera Geometric Calibration Diagnostics and Self-Calibration          | diagnostics and self-calibration                           | Y        |
| 74                                                                            | Robotics and Autonomous System: Sensing and Perception: State Estimation: Vision-Based Aiding of Dead Reckoning for Navigation of Surface Vehicles | dead reckoning for surface vehicles                        | Y        |
| 75                                                                            | Robotics and Autonomous System: Sensing and Perception: State Estimation: Map-Based Position Estimation for Navigation of Surface Vehicles         | position estimation for surface vehicles                   | Y        |
| 76                                                                            | Robotics and Autonomous System: Sensing and Perception: State Estimation: Vision-Based Aiding of Dead Reckoning for Above-Surface Vehicles         | dead reckoning for above-surface vehicles                  | Y        |
| 77                                                                            | Robotics and Autonomous System: Sensing and Perception: State Estimation: Map-Based Position Estimation for Navigation of Above-Surface Vehicles   | position estimation for above-surface vehicles             | Y        |
| 78                                                                            | Robotics and Autonomous System: Sensing and Perception: State Estimation: Radio Frequency (RF) Navigation Aiding for Above-Surface Vehicles        | RF for above-surface vehicles                              | Y        |
| 79                                                                            | Robotics and Autonomous System: Sensing and Perception: State Estimation: Altimeter for Small Above-Surface Vehicles                               | altimeter for small above-surface vehicles                 | Y        |

| <b>No.</b> | <b>Content</b>                                                                                                                           | <b>Keyword</b>                                       | <b>Included</b> |
|------------|------------------------------------------------------------------------------------------------------------------------------------------|------------------------------------------------------|-----------------|
| 80         | Robotics and Autonomous System: Sensing and Perception: State Estimation: Manipulator State Estimation                                   | manipulator<br>state estimation                      | Y               |
| 81         | Robotics and Autonomous System: Sensing and Perception: State Estimation: Manipulation Object State Estimation                           | manipulation<br>object state<br>estimation           | Y               |
| 82         | Robotics and Autonomous System: Sensing and Perception: Onboard Mapping: Terrain Mapping for Surface Vehicles                            | terrain mapping<br>for surface<br>vehicles           | Y               |
| 83         | Robotics and Autonomous System: Sensing and Perception: Onboard Mapping: Terrain Mapping for Above-Surface Vehicles                      | terrain mapping<br>for above-<br>surface vehicles    | Y               |
| 84         | Robotics and Autonomous System: Sensing and Perception: Onboard Mapping: Landmark Mapping from Image Sequences and Other Navigation Data | image<br>sequences                                   | Y               |
| 85         | Robotics and Autonomous System: Sensing and Perception: Onboard Mapping: 3D Modeling from Multiple Observations                          | 3D modeling                                          | Y               |
| 86         | Robotics and Autonomous System: Sensing and Perception: Object, Event, and Activity Recognition: Natural Object Recognition              | natural object<br>recognition                        | Y               |
| 87         | Robotics and Autonomous System: Sensing and Perception: Object, Event, and Activity Recognition: Human-Made Object Recognition           | human-made<br>object<br>recognition                  | Y               |
| 88         | Robotics and Autonomous System: Sensing and Perception: Object, Event, and Activity Recognition: Event Recognition                       | event<br>recognition                                 | Y               |
| 89         | Robotics and Autonomous System; Sensing and Perception: Force and Tactile Sensing: Space-Qualifiable Force and Torque Sensors            | space-<br>qualifiable force<br>and torque<br>sensors | Y               |
| 90         | Robotics and Autonomous System: Sensing and Perception: Force and Tactile Sensing: Space-Qualifiable Tactile Sensors                     | space-<br>qualifiable<br>tactile sensors             | Y               |
| 91         | Robotics and Autonomous System: Sensing and Perception: Onboard Science Data Analysis                                                    | onboard science<br>data analysis                     | Y               |
| 92         | Robotics and Autonomous System: Mobility: Extreme-Terrain Mobility: Rappelling Mobility Systems                                          | rappelling                                           | Y               |
| 93         | Robotics and Autonomous System: Mobility: Extreme-Terrain Mobility: Climbing Mobility Systems                                            | climbing                                             | Y               |

| <b>No.</b> | <b>Content</b>                                                                                                        | <b>Keyword</b>                | <b>Included</b> |
|------------|-----------------------------------------------------------------------------------------------------------------------|-------------------------------|-----------------|
| 94         | Robotics and Autonomous System: Mobility:<br>Extreme-Terrain Mobility: Soft/Friable Terrain<br>Mobility Systems       | soft/friable<br>terrain       | Y               |
| 95         | Robotics and Autonomous System: Mobility:<br>Below-Surface Mobility: Subsurface Access<br>Through Natural Cavities    | natural cavities              | Y               |
| 96         | Robotics and Autonomous System: Mobility:<br>Below-Surface Mobility: Subsurface Access<br>Through Human-Made Holes    | human-made<br>holes           | Y               |
| 97         | Robotics and Autonomous System: Mobility:<br>Below-Surface Mobility: Burrowing Mobility                               | burrowing                     | Y               |
| 98         | Robotics and Autonomous System: Mobility:<br>Below-Surface Mobility: Long-Endurance<br>Submerged Mobility             | submerged                     | Y               |
| 99         | Robotics and Autonomous System: Mobility:<br>Above-Surface Mobility: Ballistic Systems                                | ballistic                     | Y               |
| 100        | Robotics and Autonomous System: Mobility:<br>Above-Surface Mobility: Static-Lift Systems                              | static-lift                   | Y               |
| 101        | Robotics and Autonomous System: Mobility:<br>Above-Surface Mobility: Dynamic-Lift Systems                             | dynamic-lift                  | Y               |
| 102        | Robotics and Autonomous System: Mobility:<br>Above-Surface Mobility: Power-Lift Systems                               | power-lift                    | Y               |
| 103        | Robotics and Autonomous System: Mobility:<br>Small-Body and Microgravity Mobility: Free-<br>Floating Robots           | free-floating                 | Y               |
| 104        | Robotics and Autonomous System: Mobility:<br>Small-Body and Microgravity Mobility:<br>Hopping/Tumbling Surface Robots | hopping/tumblin<br>g          | Y               |
| 105        | Robotics and Autonomous System: Mobility:<br>Small-Body and Microgravity Mobility:<br>Anchoring Robots                | anchoring                     | Y               |
| 106        | Robotics and Autonomous System: Mobility:<br>Small-Body and Microgravity Mobility:<br>Wheeled/Tracked/Hybrid Robots   | wheeled/tracked<br>/hybrid    | Y               |
| 107        | Robotics and Autonomous System: Mobility:<br>Surface Mobility: Mobility Subsystem for Crewed<br>Surface Transport     | crewed surface<br>transport   | Y               |
| 108        | Robotics and Autonomous System: Mobility:<br>Surface Mobility: Mobility System for Uncrewed<br>Surface Transport      | uncrewed<br>surface transport | Y               |
| 109        | Robotics and Autonomous System: Mobility:<br>Robot Navigation: Adaptive Autonomous Surface<br>Navigation              | surface<br>navigation         | Y               |

| <b>No.</b> | <b>Content</b>                                                                                                  | <b>Keyword</b>                              | <b>Included</b> |
|------------|-----------------------------------------------------------------------------------------------------------------|---------------------------------------------|-----------------|
| 110        | Robotics and Autonomous System: Mobility:<br>Robot Navigation: Autonomous Navigation for<br>Tethered Systems    | autonomous<br>navigation                    | Y               |
| 111        | Robotics and Autonomous System: Mobility:<br>Robot Navigation: Low-Altitude Above-Surface<br>Navigation         | low-altitude<br>above-surface<br>navigation | Y               |
| 112        | Robotics and Autonomous System: Mobility:<br>Robot Navigation: Below-Surface Navigation                         | below-surface<br>navigation                 | Y               |
| 113        | Robotics and Autonomous System: Mobility:<br>Robot Navigation: Small-Body/Microgravity<br>Navigation            | small-<br>body/microgravi<br>ty navigation  | Y               |
| 114        | Robotics and Autonomous System: Mobility:<br>Collaborative Mobility: Collaborative Mobility<br>Algorithms       | collaborative<br>mobility                   | Y               |
| 115        | Robotics and Autonomous System: Mobility:<br>Mobility Components: Wheels for Planetary<br>Surfaces              | wheels for<br>planetary<br>surfaces         | Y               |
| 116        | Robotics and Autonomous System: Mobility:<br>Mobility Components: Actuators for Mobile<br>Robots                | actuators for<br>mobile robots              | Y               |
| 117        | Robotics and Autonomous System: Mobility:<br>Mobility Components: Terrain Adhesion                              | terrain adhesion                            | Y               |
| 118        | Robotics and Autonomous System: Mobility:<br>Mobility Components: Sensing Terra-Mechanical<br>Properties        | sensing terra-<br>mechanical<br>properties  | Y               |
| 119        | Robotics and Autonomous System: Manipulation:<br>Manipulator Components: Actuators                              | actuators                                   | Y               |
| 120        | Robotics and Autonomous System: Manipulation:<br>Manipulator Components: Lightweight Structures                 | lightweight                                 | Y               |
| 121        | Robotics and Autonomous System: Manipulation:<br>Manipulator Components: Motor Controllers                      | motor                                       | Y               |
| 122        | Robotics and Autonomous System: Manipulation:<br>Manipulator Components: Manipulator Concepts                   | manipulator                                 | Y               |
| 123        | Robotics and Autonomous System: Manipulation:<br>Dexterous Manipulation: Dexterous Manipulator<br>Arms          | dexterous<br>manipulator<br>arms            | Y               |
| 124        | Robotics and Autonomous System: Manipulation:<br>Dexterous Manipulation: Dexterous Manipulator<br>End Effectors | manipulator end<br>effectors                | Y               |
| 125        | Robotics and Autonomous System: Manipulation:<br>Modeling of Contact Dynamics                                   | contact<br>dynamics                         | Y               |
| 126        | Robotics and Autonomous System: Manipulation:<br>Mobile Manipulation: Mobile Manipulation                       | mobile<br>manipulation                      | Y               |

| <b>No.</b> | <b>Content</b>                                                                                                                       | <b>Keyword</b>                                                        | <b>Included</b> |
|------------|--------------------------------------------------------------------------------------------------------------------------------------|-----------------------------------------------------------------------|-----------------|
| 127        | Robotics and Autonomous System: Manipulation:<br>Collaborative Manipulation: Collaborative<br>Manipulation                           | collaborative<br>manipulation                                         | Y               |
| 128        | Robotics and Autonomous System: Manipulation:<br>Sample Acquisition and Handling: Robotic<br>Drilling                                | drilling                                                              | Y               |
| 129        | Robotics and Autonomous System: Manipulation:<br>Sample Acquisition and Handling: Deep Robotic<br>Drilling                           | deep drilling                                                         | Y               |
| 130        | Robotics and Autonomous System: Manipulation:<br>Sample Acquisition and Handling:<br>Surface/Shallow Robotic Sample Acquisition      | surface/shallow<br>sample<br>acquisition                              | Y               |
| 131        | Robotics and Autonomous System: Manipulation:<br>Sample Acquisition and Handling: Subsurface<br>Robotic Sample Acquisition           | subsurface<br>sample<br>acquisition                                   | Y               |
| 132        | Robotics and Autonomous System: Manipulation:<br>Sample Acquisition and Handling: Sample<br>Handling                                 | sample handling                                                       | Y               |
| 133        | Robotics and Autonomous System: Manipulation:<br>Sample Acquisition and Handling:<br>Regolith/Volatiles Sample Handling and Transfer | sample handling<br>and transfer                                       | Y               |
| 134        | Robotics and Autonomous System: Manipulation:<br>Sample Acquisition and Handling: Robotic<br>Excavation                              | excavation                                                            | Y               |
| 135        | Robotics and Autonomous System: Manipulation:<br>Grappling: Grappling                                                                | grappling                                                             | Y               |
| 136        | Robotics and Autonomous System: Human–<br>System Interaction: Multi-Modal Interaction:<br>Virtual Environment                        | virtual<br>environment                                                | Y               |
| 137        | Robotics and Autonomous System: Human–<br>System Interaction: Multi-Modal Interaction:<br>Multi-Modal Dialogue                       | multi-modal<br>dialogue                                               | Y               |
| 138        | Robotics and Autonomous System: Human–<br>System Interaction: Supervisory Control                                                    | supervisory                                                           | Y               |
| 139        | Robotics and Autonomous System: Human–<br>System Interaction: Proximate Interaction: Robot-<br>to-Suit Interfaces                    | robot-to-suit<br>interfaces                                           | Y               |
| 140        | Robotics and Autonomous System: Human–<br>System Interaction: Proximate Interaction: Intent<br>Recognition and Reaction              | intent<br>recognition and<br>reaction for<br>proximate<br>interaction | Y               |
| 141        | Robotics and Autonomous System: Human–                                                                                               | feedback                                                              | Y               |

| <b>No.</b> | <b>Content</b>                                                                                                                                | <b>Keyword</b>                                   | <b>Included</b> |
|------------|-----------------------------------------------------------------------------------------------------------------------------------------------|--------------------------------------------------|-----------------|
|            | System Interaction: Proximate Interaction: Feedback Displays for Proximate Interaction                                                        | displays                                         |                 |
| 142        | Robotics and Autonomous System: Human–System Interaction: Intent Recognition and Reaction                                                     | intent<br>recognition and<br>reaction            | Y               |
| 143        | Robotics and Autonomous System: Human–System Interaction: Distributed Collaboration and Coordination: Interaction Architecture                | interaction<br>architecture                      | Y               |
| 144        | Robotics and Autonomous System: Human–System Interaction: Distributed Collaboration and Coordination: In-Line Performance Metrics             | in-line<br>performance<br>metrics                | Y               |
| 145        | Robotics and Autonomous System: Human–System Interaction: Distributed Collaboration and Coordination: Notification and Summarization          | notification and<br>summarization                | Y               |
| 146        | Robotics and Autonomous System: Human–System Interaction: Common Human–System Interfaces                                                      | common<br>human–system<br>interfaces             | Y               |
| 147        | Robotics and Autonomous System: Human–System Interaction: Safety, Trust, and Interfacing of Robotic/Human Proximity Operations                | safety, trust, and<br>interfacing                | Y               |
| 148        | Robotics and Autonomous System: Human–System Interaction: Remote Interaction: Direct Teleoperation                                            | direct<br>teleoperation                          | Y               |
| 149        | Robotics and Autonomous System: Human–System Interaction: Remote Interaction: Supervisory Control                                             | supervisory<br>control                           | Y               |
| 150        | Robotics and Autonomous System: Human–System Interaction: Decision Support Tools for Remote Interaction                                       | remote<br>interaction                            | Y               |
| 151        | Robotics and Autonomous System: System-Level Autonomy: System Health Management: Onboard Real-Time Fault Detection, Isolation, and Recovery   | onboard FDIR                                     | Y               |
| 152        | Robotics and Autonomous System: System-Level Autonomy: System Health Management: Ground-Based Fault Detection, Isolation, and Recovery (FDIR) | ground-based<br>FDIR                             | Y               |
| 153        | Robotics and Autonomous System: System-Level Autonomy: System Health Management: Integrated Vehicle Health Management (IVHM)                  | IVHM                                             | Y               |
| 154        | Robotics and Autonomous System: System-Level Autonomy: Activity Planning, Scheduling, and Execution: On board Real-Time Planning and          | onboard real-<br>time planning<br>and scheduling | Y               |

| <b>No.</b> | <b>Content</b>                                                                                                                                                      | <b>Keyword</b>                                                 | <b>Included</b> |
|------------|---------------------------------------------------------------------------------------------------------------------------------------------------------------------|----------------------------------------------------------------|-----------------|
|            | Scheduling                                                                                                                                                          |                                                                |                 |
| 155        | Robotics and Autonomous System: System-Level<br>Autonomy: Activity Planning, Scheduling, and<br>Execution: Ground-Based Mixed Initiative<br>Planning and Scheduling | ground-based<br>mixed initiative<br>planning and<br>scheduling | Y               |
| 156        | Robotics and Autonomous System: System-Level<br>Autonomy: Activity Planning, Scheduling, and<br>Execution: Plan/ Sequence/Schedule Verification<br>Tools            | plan/<br>sequence/schedu<br>le verification                    | Y               |
| 157        | Robotics and Autonomous System: System-Level<br>Autonomy: Activity Planning, Scheduling, and<br>Execution: Onboard Executives                                       | onboard<br>executives                                          | Y               |
| 158        | Robotics and Autonomous System: System-Level<br>Autonomy: Activity Planning, Scheduling, and<br>Execution: State Management                                         | state<br>management                                            | Y               |
| 159        | Robotics and Autonomous System: System-Level<br>Autonomy: Autonomous Guidance and Control                                                                           | guidance and<br>control                                        | Y               |
| 160        | Robotics and Autonomous System: System-Level<br>Autonomy: Multi-Agent Coordination: Multi-<br>Agent Coordination                                                    | multi-agent<br>coordination                                    | Y               |
| 161        | Robotics and Autonomous System: System-Level<br>Autonomy: Adjustable Autonomy                                                                                       | adjustable<br>autonomy                                         | Y               |
| 162        | Robotics and Autonomous System: System-Level<br>Autonomy: Terrain Relative Navigation                                                                               | terrain relative<br>navigation                                 | Y               |
| 163        | Robotics and Autonomous System: System-Level<br>Autonomy: Path and Motion Planning with<br>Uncertainty                                                              | path and motion<br>planning                                    | Y               |
| 164        | Robotics and Autonomous System: System-Level<br>Autonomy: Automated Data Analysis for Decision<br>Making: Autonomous Decision Making                                | autonomous<br>decision making                                  | Y               |
| 165        | Robotics and Autonomous System: Autonomous<br>Rendezvous and Docking: Relative Navigation<br>Sensors: 3D Imaging Sensor                                             | 3D imaging                                                     | Y               |
| 166        | Robotics and Autonomous System: Autonomous<br>Rendezvous and Docking: Relative Navigation<br>Sensors: Visible Camera                                                | visible camera                                                 | Y               |
| 167        | Robotics and Autonomous System: Autonomous<br>Rendezvous and Docking: Relative Navigation<br>Sensors: Longwave Infrared (LWIR) Camera                               | LWIR                                                           | Y               |
| 168        | Robotics and Autonomous System: Autonomous<br>Rendezvous and Docking: Guidance, Navigation,<br>and Control Algorithms: Rendezvous Targeting                         | rendezvous<br>targeting                                        | Y               |
| 169        | Robotics and Autonomous System: Autonomous                                                                                                                          | operations/captu                                               | Y               |

| <b>No.</b> | <b>Content</b>                                                                                                                                                              | <b>Keyword</b>                                       | <b>Included</b> |
|------------|-----------------------------------------------------------------------------------------------------------------------------------------------------------------------------|------------------------------------------------------|-----------------|
|            | Robotics and Autonomous System: Autonomous Rendezvous and Docking: Guidance, Navigation, and Control Algorithms: Proximity Operations/Capture/Docking Guidance              | re/docking<br>guidance                               |                 |
| 170        | Robotics and Autonomous System: Autonomous Rendezvous and Docking: Docking and Capture Mechanisms and Interfaces: Integrated Docking and Automated Rendezvous System Design | integrated<br>docking and<br>automated<br>rendezvous | Y               |
| 171        | Robotics and Autonomous System: Autonomous Rendezvous and Docking: Docking and Capture Mechanisms and Interfaces: Docking System for Exploration                            | docking                                              | Y               |
| 172        | Robotics and Autonomous System: Autonomous Rendezvous and Docking: Mission and System Managers for Autonomy and Automation                                                  | mission and<br>system<br>managers                    | Y               |
| 173        | Robotics and Autonomous System: Systems Engineering: Modularity, Commonality, and Interfaces: Refueling Interfaces                                                          | refueling<br>interfaces                              | Y               |
| 174        | Robotics and Autonomous System: Systems Engineering: Modularity, Commonality, and Interfaces: Modular Serviceable Interfaces                                                | modular<br>serviceable<br>interfaces                 | Y               |
| 175        | Robotics and Autonomous System: Systems Engineering: Modularity, Commonality, and Interfaces: Self-Assembling and Configuration Features                                    | self-assembling<br>and<br>configuration              | Y               |
| 176        | Robotics and Autonomous System: Systems Engineering: Modularity, Commonality, and Interfaces: Marsupial Robot Interfaces                                                    | marsupial<br>interfaces                              | Y               |
| 177        | Robotics and Autonomous System: Systems Engineering: Verification and Validation of Complex Adaptive Systems: Verification and Validation of Complex Adaptive Systems       | complex<br>adaption                                  | Y               |
| 178        | Robotics and Autonomous System: Systems Engineering: Robot Modeling and Simulation: End-to-End Systems Modeling                                                             | end-to-end                                           | Y               |
| 179        | Robotics and Autonomous System: System Engineering: Robot Modeling and Simulation: Modeling of Contact Dynamics                                                             | contact<br>dynamics                                  | Y               |
| 180        | Robotics and Autonomous System: Systems Engineering: Robot Modeling and Simulation: Dynamic Simulation                                                                      | dynamic<br>simulation                                | Y               |
| 181        | Robotics and Autonomous System: Systems Engineering: Robot Modeling and Simulation: Granular Media Simulation                                                               | granular media                                       | Y               |

| No.                                                                   | Content                                                                                                                                | Keyword                                             | Included |
|-----------------------------------------------------------------------|----------------------------------------------------------------------------------------------------------------------------------------|-----------------------------------------------------|----------|
| 182                                                                   | Robotics and Autonomous System: Systems Engineering: Robot Software: Robotic Architecture and Frameworks                               | architecture and frameworks                         | Y        |
| 183                                                                   | Robotics and Autonomous System: Systems Engineering: Robot Software: Standardized Messaging Protocols                                  | messaging protocols                                 | Y        |
| 184                                                                   | Robotics and Autonomous System: Systems Engineering: Robot Software: Model-Based Robotic Software                                      | model-based robotic software                        | Y        |
| 185                                                                   | Robotics and Autonomous System: Systems Engineering: Safety and Trust: Safety, Trust, and Interfacing Proximity Operation Technologies | safety, trust, and proximity operation technologies | Y        |
| <b>Plan 4: A Roadmap for U.S. Robotics: From Internet to Robotics</b> |                                                                                                                                        |                                                     |          |
| 186                                                                   | Robotics in Manufacturing: Learning and Adaptation                                                                                     | learning and adaptation in manufacturing modeling,  | Y        |
| 187                                                                   | Robotics in Manufacturing: Modeling, Analysis, Simulation, and Control                                                                 | analysis, simulation, and control                   | Y        |
| 188                                                                   | Robotics in Manufacturing: Formal Methods                                                                                              | formal methods in manufacturing control and         | Y        |
| 189                                                                   | Robotics in Manufacturing: Control and Planning                                                                                        | planning in manufacturing perception in             | Y        |
| 190                                                                   | Robotics in Manufacturing: Perception                                                                                                  | manufacturing mechanisms and                        | Y        |
| 191                                                                   | Robotics in Manufacturing: Novel Mechanisms and High-Performance Actuators                                                             | actuators in manufacturing human–robot              | Y        |
| 192                                                                   | Robotics in Manufacturing: Human–Robot Interaction                                                                                     | interaction in manufacturing architecture and       | Y        |
| 193                                                                   | Robotics in Manufacturing: Architecture and Representations                                                                            | representations in manufacturing measurement        | Y        |
| 194                                                                   | Robotics in Manufacturing: Measurement Science                                                                                         | science                                             | Y        |
| 195                                                                   | Robotics in Manufacturing: “Cloud” Robotics and                                                                                        | cloud and                                           | Y        |

| <b>No.</b> | <b>Content</b>                                                                        | <b>Keyword</b>                                             | <b>Included</b> |
|------------|---------------------------------------------------------------------------------------|------------------------------------------------------------|-----------------|
|            | Automation for Manufacturing                                                          | automation for manufacturing architecture and              |                 |
| 196        | Healthcare and Medical Robotics: Architecture and Representations                     | representations in healthcare and medical                  | Y               |
| 197        | Healthcare and Medical Robotics: Formal Methods                                       | formal methods in healthcare and medical                   | Y               |
| 198        | Healthcare and Medical Robotics: Control and Planning                                 | control and planning in healthcare and medical             | Y               |
| 199        | Healthcare and Medical Robotics: Perception                                           | perception in healthcare and medical                       | Y               |
| 200        | Healthcare and Medical Robotics: Robust, High-Fidelity Sensors                        | robust, high-fidelity in healthcare and medical            | Y               |
| 201        | Healthcare and Medical Robotics: Novel Mechanisms and High-Performance Actuators      | mechanisms and actuators in healthcare and medical         | Y               |
| 202        | Healthcare and Medical Robotics: Learning and Adaptation                              | learning and adaptation in healthcare and medical          | Y               |
| 203        | Healthcare and Medical Robotics: Physical Human–Robot Interaction                     | physical human–robot interaction in healthcare and medical | Y               |
| 204        | Healthcare and Medical Robotics: Interaction Algorithms for Socially Assistive Robots | interaction algorithms                                     | Y               |
| 205        | Healthcare and Medical Robotics: Modeling, Simulation, and Analysis                   | modeling, simulation, and analysis                         | Y               |
| 206        | Service Robotics: Architecture and Representations                                    | architecture and representations in service                | Y               |
| 207        | Service Robotics: Control and Planning                                                | control and planning in                                    | Y               |

| No.                                                                                              | Content                                                           | Keyword                                              | Included |
|--------------------------------------------------------------------------------------------------|-------------------------------------------------------------------|------------------------------------------------------|----------|
| 208                                                                                              | Service Robotics: Perception                                      | service<br>perception in<br>service                  | Y        |
| 209                                                                                              | Service Robotics: Robust, High-Fidelity Sensors                   | robust, high-<br>fidelity in<br>service              | Y        |
| 210                                                                                              | Service Robotics: Novel Mechanisms and High-Performance Actuators | mechanisms and<br>actuators in<br>service            | Y        |
| 211                                                                                              | Service Robotics: Learning and Adaptation                         | learning and<br>adaptation in<br>service             | Y        |
| 212                                                                                              | Service Robotics: Physical Human–Robot Interaction                | physical<br>human–robot<br>interaction in<br>service | Y        |
| 213                                                                                              | Service Robotics: Socially Interactive Robots                     | socially<br>interactive                              | Y        |
| 214                                                                                              | Robot Applications in Space: Sensing and Perception               | sensing and<br>perception                            | Y        |
| 215                                                                                              | Robot Applications in Space: Mobility                             | mobility in<br>space                                 | Y        |
| 216                                                                                              | Robot Applications in Space: Manipulation Technology              | manipulation<br>technology                           | Y        |
| 217                                                                                              | Robot Applications in Space: Human–System Interaction             | human–system<br>interaction                          | Y        |
| 218                                                                                              | Robot Applications in Space: Autonomy                             | autonomy in<br>space                                 | Y        |
| 219                                                                                              | Robot Applications in Defense: Interoperability                   | interoperability<br>in defense                       | Y        |
| 220                                                                                              | Robot Applications in Defense: Autonomy                           | autonomy in<br>defense                               | Y        |
| 221                                                                                              | Robot Applications in Defense: Communications                     | communications                                       | Y        |
| 222                                                                                              | Robot Applications in Defense: Propulsion and Power               | propulsion<br>power                                  | Y        |
| 223                                                                                              | Robot Applications in Defense: Manned–Unmanned Teaming            | manned–<br>unmanned<br>teaming                       | Y        |
| <b>Government: European Union</b>                                                                |                                                                   |                                                      |          |
| <b>Plan 1: Preparing the Commission for Future Opportunities–Foresight Network Fiches (2030)</b> |                                                                   |                                                      |          |
| 224                                                                                              | Brain-inspired technologies: novel, low-power                     | neuromorphic                                         | Y        |

| No.                                                                         | Content                                                                                                           | Keyword                                | Included |
|-----------------------------------------------------------------------------|-------------------------------------------------------------------------------------------------------------------|----------------------------------------|----------|
|                                                                             | neuromorphic multi-processor systems and brain-inspired robotics                                                  | multi-processor                        |          |
| 225                                                                         | Brain-inspired technologies: conscious robots                                                                     | consciousness                          | Y        |
| 226                                                                         | Brain-inspired technologies: advanced machine learning and decision-making theory and systems                     | machine learning and decision making   | Y        |
| 227                                                                         | Brain-inspired technologies: human-computer interaction                                                           | human-computer interaction             | Y        |
| <b>Plan 2: Strategic Research Agenda for Robotics in Europe (2014–2020)</b> |                                                                                                                   |                                        |          |
| 228                                                                         | Manufacturing: Accurate indoor positioning systems for mobile manipulators, particularly in dynamic environments. | indoor positioning                     | Y        |
| 229                                                                         | Manufacturing: Sensor based safety systems to enhance human-robot interaction.                                    | interaction safety                     | Y        |
| 230                                                                         | Manufacturing: Higher levels of realism in system modeling to speed application development.                      | system modeling                        | Y        |
| 231                                                                         | Manufacturing: Reactive planning and control able to operate a robot safely in real industrial environments.      | reactive planning and control          | Y        |
| 232                                                                         | Healthcare: Improved teleoperation and physical interaction                                                       | teleoperation and physical interaction | Y        |
| 233                                                                         | Healthcare: Miniaturized mechanical systems and sensing                                                           | miniaturized                           | Y        |
| 234                                                                         | Healthcare: Multi-degree-of-freedom tactile feedback                                                              | tactile feedback                       | Y        |
| 235                                                                         | Healthcare: Inherently safe systems                                                                               | Inherently safe                        | Y        |
| 236                                                                         | Healthcare: Monitoring of patient condition and improved data interpretation during procedures                    | monitoring and interpretation          | Y        |
| 237                                                                         | Agriculture: Predictive and distributed planning                                                                  | predictive planning                    | Y        |
| 238                                                                         | Agriculture: Crop and livestock assessment and recognition of condition                                           | crop and livestock assessment          | Y        |
| 239                                                                         | Agriculture: Produce handling and processing                                                                      | produce handling and processing        | Y        |
| 240                                                                         | Agriculture: Synchronization and coordination between farm vehicles and with processing equipment                 | coordination                           | Y        |
| 241                                                                         | Agriculture: In-field localization and                                                                            | localization                           | Y        |

| No.                                | Content                                                                                       | Keyword                                | Included |
|------------------------------------|-----------------------------------------------------------------------------------------------|----------------------------------------|----------|
|                                    | communication                                                                                 | communication                          |          |
| 242                                | Civil: Mission and task planning, particularly between multiple modalities.                   | multiple modalities                    | Y        |
| 243                                | Civil: Sensing, perception, and interpretation of the environment.                            | sensing perception interpretation      | Y        |
| 244                                | Civil: Cooperative and distributed planning for multiple robots                               | cooperative planning                   | Y        |
| 245                                | Civil: Cognitive technologies for assessment and high-level interpretation                    | cognitive                              | Y        |
| 246                                | Civil: Human–robot interaction                                                                | human–robot interaction                | Y        |
| 247                                | Commercial: Safety integrated design processes                                                | safety integrated physical             | Y        |
| 248                                | Commercial: Physical human–robot interaction                                                  | human–robot interaction                | Y        |
| 249                                | Commercial: Long-term autonomy                                                                | autonomy                               | Y        |
| 250                                | Commercial: Lightweight robust mechanical structures                                          | mechanical structures                  | Y        |
| 251                                | Logistics and Transport: Interaction technology                                               | Interaction                            | Y        |
| 252                                | Logistics and Transport: Compliant mechanical systems                                         | Compliant                              | Y        |
| 253                                | Logistics and Transport: 3D environment interpretation                                        | 3D environment interpretation          | Y        |
| 254                                | Logistics and Transport: Task planning and optimization                                       | planning and optimization              | Y        |
| 255                                | Consumer: Improved sensing of the surrounding environment.                                    | sensing of the surrounding environment | Y        |
| 256                                | Consumer: Improved interpretation of the environment                                          | interpretation                         | Y        |
| 257                                | Consumer: Low-cost sensing                                                                    | Low-cost sensing                       | Y        |
| 258                                | Consumer: Physical human–robot interfaces                                                     | interfaces                             | Y        |
| 259                                | Consumer: Improved energy efficient systems                                                   | energy efficient                       | Y        |
| <b>Plan 3: ESA Technology Tree</b> |                                                                                               |                                        |          |
| 260                                | Automation, Telepresence, and Robotics: Applications and concepts: Planetary Exploration      | planetary exploration                  | Y        |
| 261                                | Automation, Telepresence, and Robotics: Applications and concepts: Orbital Systems            | orbital systems                        | Y        |
| 262                                | Automation, Telepresence, and Robotics: Automation and robotics systems: Manipulation Systems | manipulation systems                   | Y        |

| No.                                                                  | Content                                                                                                                             | Keyword                             | Included |
|----------------------------------------------------------------------|-------------------------------------------------------------------------------------------------------------------------------------|-------------------------------------|----------|
| 263                                                                  | Automation, Telepresence, and Robotics:<br>Automation and robotics systems: Mobility Systems                                        | mobility systems                    | Y        |
| 264                                                                  | Automation, Telepresence, and Robotics:<br>Automation and robotics systems: Payload Automation Systems                              | payload automation                  | Y        |
| 265                                                                  | Automation, Telepresence, and Robotics:<br>Automation and robotics components and technologies: Perception                          | perception                          | Y        |
| 266                                                                  | Automation, Telepresence, and Robotics:<br>Automation and robotics components and technologies: Control, Autonomy, and Intelligence | control, autonomy, and intelligence | Y        |
| 267                                                                  | Automation, Telepresence, and Robotics:<br>Automation and robotics components and technologies; Motion and Actuation                | motion and actuation                | Y        |
| 268                                                                  | Automation, Telepresence, and Robotics:<br>Automation and robotics components and technologies: Robot–User Interfacing              | user interfacing                    | Y        |
| 269                                                                  | Automation, Telepresence, and Robotics:<br>Automation and robotics components and technologies: Robot Ground Testing                | ground testing                      | Y        |
| <b>Government: Japan</b>                                             |                                                                                                                                     |                                     |          |
| <b>Plan 1: Japan’s Robot Strategy: Vision, Strategy, Action Plan</b> |                                                                                                                                     |                                     |          |
| 270                                                                  | Artificial Intelligence: data-driven artificial intelligence                                                                        | data-driven                         | Y        |
| 271                                                                  | Artificial Intelligence: knowledge representing and reasoning artificial intelligence                                               | knowledge representing reasoning    | Y        |
| 272                                                                  | Artificial Intelligence: research and development of such technology as brain-like artificial intelligence                          | brain-like                          | Y        |
| 273                                                                  | Sensor and Recognition System: environment-learning vision sensor                                                                   | environment-learning vision         | Y        |
| 274                                                                  | Sensor and Recognition System: voice processing and recognition technology under low signal-to-noise ratio                          | voice                               | Y        |
| 275                                                                  | Sensor and Recognition System: smell sensor                                                                                         | smell                               | Y        |
| 276                                                                  | Sensor and Recognition System: distributed touch sensor system                                                                      | touch                               | Y        |
| 277                                                                  | Sensor and Recognition System: sensor fusion system integrating these sensors                                                       | sensor fusion                       | Y        |
| 278                                                                  | Mechanism, Actuator, and their Control System:                                                                                      | PWR                                 | Y        |

| No.                                                                                   | Content                                                                                                                                                               | Keyword                           | Included |
|---------------------------------------------------------------------------------------|-----------------------------------------------------------------------------------------------------------------------------------------------------------------------|-----------------------------------|----------|
| 279                                                                                   | low cost and high power-to-weight ratio (PWR) Mechanism, Actuator, and their Control System: multi-degree-of-freedom actuators imitating the human joint              | multi-degree-of-freedom actuators | Y        |
| 280                                                                                   | Mechanism, Actuator, and their Control System: high-molecular lightweight artificial muscle and a control theory for smooth control of such a highly nonlinear system | muscle control                    | Y        |
| 281                                                                                   | Mechanism, Actuator, and their Control System: general-purpose hand system for bilateral control                                                                      | general-purpose hand              | Y        |
| 282                                                                                   | OS and Middleware: simulators simulate working environment                                                                                                            | simulated working environment     | Y        |
| 283                                                                                   | OS and Middleware: OS and middleware that can work with simulators                                                                                                    | middleware simulators             | Y        |
| 284                                                                                   | OS and Middleware: general-purpose OS and middleware that can be used as the standards                                                                                | middleware standards              | Y        |
| 285                                                                                   | Security and safety evaluation and standard: safety evaluation and risk prediction                                                                                    | prediction                        | Y        |
| 286                                                                                   | Security and safety evaluation and standard: establishment and standardization of test methods                                                                        | test                              | Y        |
| 287                                                                                   | Security and safety evaluation and standard: rules for handling information collected by robots                                                                       | rules                             | Y        |
| 288                                                                                   | Security and safety evaluation and standard: examination and research and development of security technology                                                          | security                          | Y        |
| 289                                                                                   | Technology converted from other broad areas: long-life, compact, and lightweight battery technology                                                                   | battery                           | Y        |
| 290                                                                                   | Technology converted from other broad areas: wireless electricity supply technology                                                                                   | electricity supply                | Y        |
| 291                                                                                   | Technology converted from other broad areas: communication technology                                                                                                 | communication                     | Y        |
| 292                                                                                   | Technology converted from other broad areas: material technology                                                                                                      | material                          | Y        |
| <b>Plan 2: White Paper on Robotization of Industry, Business, and Our Life (2014)</b> |                                                                                                                                                                       |                                   |          |
| 293                                                                                   | Industrial Robots: mechanical technology                                                                                                                              | mechanical                        | N        |
| 294                                                                                   | Industrial Robots: material technology                                                                                                                                | material                          | N        |
| 295                                                                                   | Lifestyle and Service Field Robotization Industries: safe engineering                                                                                                 | safe                              | N        |
| 296                                                                                   | Lifestyle and Service Field Robotization Industries: spacing intelligence                                                                                             | spacing                           | N        |

| No.                                                                     | Content                                                                                                          | Keyword                                  | Included |
|-------------------------------------------------------------------------|------------------------------------------------------------------------------------------------------------------|------------------------------------------|----------|
| 297                                                                     | Lifestyle and Service Field Robotization Industries: service engineering                                         | service                                  | N        |
| 298                                                                     | Lifestyle and Service Field Robotization Industries: humanoids                                                   | humanoids                                | N        |
| 299                                                                     | Lifestyle and Service Field Robotization Industries: BMI                                                         | BMI                                      | N        |
| 300                                                                     | Lifestyle and Service Field Robotization Industries: cognitive development systems                               | cognitive                                | N        |
| 301                                                                     | Lifestyle and Service Field Robotization Industries: life design                                                 | life                                     | N        |
| 302                                                                     | Lifestyle and Service Field Robotization Industries: elderly people                                              | elderly people                           | Y        |
| <b>Government: United Kingdom of Great Britain and Northern Ireland</b> |                                                                                                                  |                                          |          |
| <b>Plan 1: Robotics and Autonomous Systems (2020)</b>                   |                                                                                                                  |                                          |          |
| 303                                                                     | Robotics and Autonomous Systems: Aerospace: aerospace robotic systems                                            | aerospace                                | Y        |
| 304                                                                     | Robotics and Autonomous Systems: Aerospace: unmanned aircraft systems: collision detection and avoidance systems | collision detect and avoid systems       | Y        |
| 305                                                                     | Robotics and Autonomous Systems: Offshore Energy: Autonomous marine robots                                       | Autonomous marine                        | Y        |
| 306                                                                     | Robotics and Autonomous Systems: Offshore Energy: underwater robotics testbed                                    | underwater testbed                       | Y        |
| 307                                                                     | Robotics and Autonomous Systems: Nuclear Robotics                                                                | nuclear                                  | Y        |
| 308                                                                     | Robotics and Autonomous Systems: Intelligent Mobility: low-speed autonomous pods                                 | low-speed autonomous pods                | Y        |
| 309                                                                     | Robotics and Autonomous Systems: Farms of the Future                                                             | farms of the future                      | Y        |
| <b>Plan 2: UK-RAS Network</b>                                           |                                                                                                                  |                                          |          |
| 310                                                                     | Transport: machine vision and perception                                                                         | vision and perception                    | Y        |
| 311                                                                     | Transport: large-scale navigation                                                                                | large-scale navigation spatial           | Y        |
| 312                                                                     | Transport: spatial linguistics and exploration and planning                                                      | linguistics and exploration and planning | Y        |
| 313                                                                     | Transport: scene understanding                                                                                   | scene understanding                      | Y        |

| <b>No.</b> | <b>Content</b>                                                                                                                                                                    | <b>Keyword</b>                                              | <b>Included</b> |
|------------|-----------------------------------------------------------------------------------------------------------------------------------------------------------------------------------|-------------------------------------------------------------|-----------------|
| 314        | Transport: control and verification                                                                                                                                               | control and verification                                    | Y               |
| 315        | Transport: high-fidelity scalable simulation environments                                                                                                                         | simulation environments                                     | Y               |
| 316        | Healthcare: miniaturized robots for MIS and targeted therapy with micro-instruments and smart actuators supported by new materials                                                | miniaturized and smart                                      | Y               |
| 317        | Healthcare: micro-fabrication and rapid prototyping technologies                                                                                                                  | micro-fabrication and rapid prototyping                     | Y               |
| 318        | Healthcare: bioinspired and soft robotics                                                                                                                                         | bioinspired and soft                                        | Y               |
| 319        | Healthcare: self-assembled robots with integrated electronics, actuators, and sensors embedded during production                                                                  | self-assembled                                              | Y               |
| 320        | Healthcare: assisted robotics including home/personal use, nursing/caring, paramedical, social activation (for dementia and cognitive disabilities) and smart prostheses/ortheses | assistance                                                  | Y               |
| 321        | Manufacturing: professional service robots                                                                                                                                        | professional service                                        | Y               |
| 322        | Manufacturing: new RAS platforms for green manufacturing                                                                                                                          | green manufacturing                                         | Y               |
| 323        | Manufacturing: collaboration and robot integration                                                                                                                                | collaboration and integration                               | Y               |
| 324        | Unmanned Systems: increased autonomy                                                                                                                                              | increased autonomy                                          | Y               |
| 325        | Unmanned Systems: assessing environmental obstacles, hazards, and constraints                                                                                                     | assessing environmental obstacles, hazards, and constraints | Y               |
| 326        | Unmanned Systems: sensing and understanding complex, dynamic environments                                                                                                         | sensing and understanding environments                      | Y               |
| 327        | Unmanned Systems: navigation under extreme conditions                                                                                                                             | navigation under extreme conditions                         | Y               |
| 328        | Unmanned Systems: improved and resilient communications                                                                                                                           | improved and resilient communications                       | Y               |
| 329        | Unmanned Systems: more efficient capabilities                                                                                                                                     | modularity,                                                 | Y               |

| No.                                                                               | Content                                                                                                                                                         | Keyword                                                                                                | Included |
|-----------------------------------------------------------------------------------|-----------------------------------------------------------------------------------------------------------------------------------------------------------------|--------------------------------------------------------------------------------------------------------|----------|
|                                                                                   | through modularity, commonality, and interoperability                                                                                                           | commonality and interoperability                                                                       |          |
| 330                                                                               | Underpinning RAS technologies: multi-modal and multi-scale RAS                                                                                                  | multi-modal and multi-scale RAS learning,                                                              | Y        |
| 331                                                                               | Underpinning RAS technologies: robot learning, anthropomorphic, and bio-inspired designs                                                                        | anthropomorphic and bio-inspired                                                                       | Y        |
| 332                                                                               | Underpinning RAS technologies: micro-engineering and fabrication                                                                                                | micro-engineering and fabrication                                                                      | Y        |
| 333                                                                               | Underpinning RAS technologies: smart actuators and sensors                                                                                                      | actuators and sensors                                                                                  | Y        |
| 334                                                                               | Underpinning RAS technologies: embedded intelligence                                                                                                            | embedded intelligence                                                                                  | Y        |
| 335                                                                               | Underpinning RAS technologies: robot vision, perception, machine intelligence, software agents, control, and verification                                       | vision, perception, machine intelligence, software agents, control and verification                    | Y        |
| 336                                                                               | Underpinning RAS technologies: flexible adaptive manipulation, sensorimotor, social intelligence, and formal verification for ethical, legal, and safety issues | manipulation, sensorimotor, social intelligence and formal verification for ethical, legal, and safety | Y        |
| 337                                                                               | Underpinning RAS technologies: integrated structures and electronics                                                                                            | integrated structures and electronics                                                                  | Y        |
| 338                                                                               | Underpinning RAS technologies: human–robot interaction, simulation, and teleoperation across scales                                                             | human–robot interaction, simulation and teleoperation across scales                                    | Y        |
| <b>Plan 3: Science Landscape Seminar Reports: Robotics and Autonomous Systems</b> |                                                                                                                                                                 |                                                                                                        |          |
| 339                                                                               | Robotics and Autonomous Systems: effective regulation                                                                                                           | effective regulation                                                                                   | Y        |

| No.                                                                                      | Content                                                                                | Keyword                                      | Included |
|------------------------------------------------------------------------------------------|----------------------------------------------------------------------------------------|----------------------------------------------|----------|
| 340                                                                                      | Robotics and Autonomous Systems: more test centers                                     | test centers                                 | Y        |
| 341                                                                                      | Robotics and Autonomous Systems: autonomous systems in aerospace and medicine industry | autonomous systems in aerospace and medicine | Y        |
| 342                                                                                      | Robotics and Autonomous Systems: Standards in Technology                               | Standards in Technology                      | Y        |
| <b>Government: Russian Federation</b>                                                    |                                                                                        |                                              |          |
| <b>Plan: О национальном центре развития технологий и базовых элементов робототехники</b> |                                                                                        |                                              |          |
| 343                                                                                      | робот военного                                                                         | Military                                     | N        |
| 344                                                                                      | робот специального                                                                     | Special                                      | N        |
| 345                                                                                      | робот двойного назначения                                                              | Dual-use                                     | N        |
| <b>Government: Republic of France</b>                                                    |                                                                                        |                                              |          |
| <b>Plan: France Robots Initiatives</b>                                                   |                                                                                        |                                              |          |
| 346                                                                                      | Transport and logistics                                                                | transport and logistics                      | N        |
| 347                                                                                      | Defense and security                                                                   | defense and security                         | N        |
| 348                                                                                      | Environment                                                                            | environment                                  | N        |
| 349                                                                                      | Intelligent machines                                                                   | intelligent machines                         | N        |
| 350                                                                                      | Assistance to the person                                                               | assistance to the person                     | N        |
| <b>Government: People's Republic of China</b>                                            |                                                                                        |                                              |          |
| <b>Plan 1: “十三五” 国家科技创新规划(2016)</b>                                                      |                                                                                        |                                              |          |
| 351                                                                                      | 智能机器人-下一代机器人技术                                                                         | next generation                              | Y        |
| 352                                                                                      | 智能机器人-智能机器人学习与认知                                                                       | learning and cognition                       | Y        |
| 353                                                                                      | 智能机器人-人机自然交互与协作共融                                                                      | interaction and cooperation                  | Y        |
| 354                                                                                      | 智能机器人-机器人核心部件关键技术                                                                      | core components                              | Y        |
| 355                                                                                      | 智能机器人-工业机器人产业化                                                                         | industrialization                            | Y        |
| 356                                                                                      | 智能机器人-服务机器人产品化                                                                         | commercialized                               | Y        |
| 357                                                                                      | 智能机器人-特种机器人批量化应用                                                                       | batch application                            | Y        |
| <b>Plan 2: 中国制造 2025 (2015)</b>                                                          |                                                                                        |                                              |          |
| 358                                                                                      | 机器人-人机智能交互                                                                             | human-computer interaction                   | Y        |

| No.                                             | Content                     | Keyword                              | Included |
|-------------------------------------------------|-----------------------------|--------------------------------------|----------|
| 359                                             | 机器人-机器人本体                   | ontology                             | Y        |
| 360                                             | 机器人-减速器                     | reducer                              | Y        |
| 361                                             | 机器人-伺服电机                    | servo motor                          | Y        |
| 362                                             | 机器人-控制器                     | controller                           | Y        |
| 363                                             | 机器人-传感器                     | sensors                              | Y        |
| 364                                             | 机器人-驱动器                     | actuator                             | Y        |
|                                                 |                             | system                               |          |
| 365                                             | 机器人-系统集成设计制造                | Integration design and manufacturing | Y        |
| <b>Plan 3: 国家中长期科技发展规划纲要 2006 - 2020 (2006)</b> |                             |                                      |          |
| 366                                             | 智能服务机器人-设计方法                | design                               | Y        |
| 367                                             | 智能服务机器人-制造工艺                | manufacturing                        | Y        |
| 368                                             | 智能服务机器人-智能控制                | intelligent control                  | Y        |
|                                                 |                             | application                          |          |
| 369                                             | 智能服务机器人-应用系统集成              | system integration                   | Y        |
| 370                                             | 智能服务机器人-智能服务机器人             | intelligent service                  | Y        |
| 371                                             | 智能服务机器人-危险作业机器人             | hazardous operation                  | Y        |
| <b>Plan 4: 机器人产业发展规划 (2016—2020 年) (2016)</b>   |                             |                                      |          |
| 372                                             | 工业机器人产品-弧焊机器人-焊缝轨迹电弧跟踪      | arc welding seam trajectory tracking | Y        |
| 373                                             | 工业机器人产品-弧焊机器人-高压接触感知        | high pressure contact sensing        | Y        |
| 374                                             | 工业机器人产品-弧焊机器人-焊缝坡口宽度电弧跟踪    | arc width tracking of weld bead      | Y        |
| 375                                             | 工业机器人产品-真空（洁净）机器人-真空环境下传动润滑 | transmission lubrication             | Y        |
| 376                                             | 工业机器人产品-真空（洁净）机器人-直驱控制      | direct drive control                 | Y        |
| 377                                             | 工业机器人产品-真空（洁净）机器人-动态偏差检测与校正 | dynamic deviation                    | Y        |
| 378                                             | 工业机器人产品-真空（洁净）机器人-碰撞检测与保护   | collision detection and protection   | Y        |
| 379                                             | 工业机器人产品-全自主编程智能工业机器人        | Industry                             | Y        |

| No. | Content                             | Keyword                        | Included |
|-----|-------------------------------------|--------------------------------|----------|
| 380 | 工业机器人产品-人机协作机器人                     | man-machine cooperation        | Y        |
| 381 | 工业机器人产品-双臂机器人                       | dual-arm auxiliary             | Y        |
| 382 | 工业机器人产品-重载 AGV-辅助磁导航                | magnetic navigation            | Y        |
| 383 | 工业机器人产品-重载 AGV-激光防碰                 | laser anti-collision           | Y        |
| 384 | 工业机器人产品-重载 AGV-车体自举升                | car body self-lifting          | Y        |
| 385 | 工业机器人产品-消防救援机器人                     | fire rescue                    | Y        |
| 386 | 工业机器人产品-手术机器人                       | surgery                        | Y        |
| 387 | 工业机器人产品-智能型公共服务机器人                  | public service                 | Y        |
| 388 | 工业机器人产品-智能护理机器人                     | intelligent nursing            | Y        |
| 389 | 机器人关键零部件-高精密减速器-高强度耐磨材料技术           | wear-resistant materials       | Y        |
| 390 | 机器人关键零部件-高精密减速器-加工工艺优化技术            | processing optimization        | Y        |
| 391 | 机器人关键零部件-高精密减速器-高速润滑技术              | high speed lubrication         | Y        |
| 392 | 机器人关键零部件-高精密减速器-高精度装配技术             | high-precision assembly        | Y        |
| 393 | 机器人关键零部件-高精密减速器-可靠性及寿命检测技术          | reliability and life detection | Y        |
| 394 | 机器人关键零部件-高精密减速器-新型传动机理              | transmission mechanism         | Y        |
| 395 | 机器人关键零部件-高性能机器人专用伺服电机和驱动器-高磁性材料优化   | magnetic material optimization | Y        |
| 396 | 机器人关键零部件-高性能机器人专用伺服电机和驱动器-一体化优化设计   | integrated optimization        | Y        |
| 397 | 机器人关键零部件-高性能机器人专用伺服电机和驱动器-加工装配工艺优化  | process optimization           | Y        |
| 398 | 机器人关键零部件-高性能机器人专用伺服电机和驱动器-高力矩直接驱动电机 | high-torque direct drive motor | Y        |
| 399 | 机器人关键零部件-高性能机器人专用伺服电机和驱动器-盘式中空电机    | disc hollow motor              | Y        |
| 400 | 机器人关键零部件-高速高性能控制器-高性能关节伺服           | joint Servo                    | Y        |
| 401 | 机器人关键零部件-高速高性能控制器-振动抑制技术            | vibration suppression          | Y        |

| No. | Content                           | Keyword                                             | Included |
|-----|-----------------------------------|-----------------------------------------------------|----------|
| 402 | 机器人关键零部件-高速高性能控制器-惯量动态补偿技术        | inertia dynamic compensation                        | Y        |
| 403 | 机器人关键零部件-高速高性能控制器-多关节高精度运动解算及规划   | multi-joint motion solution and planning controller | Y        |
| 404 | 机器人关键零部件-高速高性能控制器-开放式控制器软件开发平台技术  | software development platform                       | Y        |
| 405 | 机器人关键零部件-传感器-关节位置传感器              | joint position sensor                               | Y        |
| 406 | 机器人关键零部件-传感器-力矩传感器                | torque sensor                                       | Y        |
| 407 | 机器人关键零部件-传感器-视觉传感器                | vision sensor                                       | Y        |
| 408 | 机器人关键零部件-传感器-触觉传感器                | tactile sensor                                      | Y        |
| 409 | 机器人关键零部件-末端执行器-抓取与操作功能的多指灵巧手      | multi-fingered dexterous hand                       | Y        |
| 410 | 机器人关键零部件-末端执行器-具有快换功能的夹持器         | holder                                              | Y        |
| 411 | 机器人共性关键技术-工业机器人关键技术-高性能工业机器人工业设计  | industrial design                                   | Y        |
| 412 | 机器人共性关键技术-工业机器人关键技术-运动控制          | motion control                                      | Y        |
| 413 | 机器人共性关键技术-工业机器人关键技术-精确参数辨识补偿      | parameter identification                            | Y        |
| 414 | 机器人共性关键技术-工业机器人关键技术-协同作业与调度       | collaboration and scheduling                        | Y        |
| 415 | 机器人共性关键技术-工业机器人关键技术-示教/编程         | teach/program                                       | Y        |
| 416 | 机器人共性关键技术-服务机器人关键技术-人机协同与安全       | man-machine cooperation and security                | Y        |
| 417 | 机器人共性关键技术-服务机器人关键技术-产品创意与性能优化设计   | product creativity and performance optimization     | Y        |
| 418 | 机器人共性关键技术-服务机器人关键技术-模块化/标准化体系结构设计 | architecture design                                 | Y        |
| 419 | 机器人共性关键技术-服务机器人关键技术-信息技术融合        | technological convergence of information            | Y        |
| 420 | 机器人共性关键技术-服务机器人关键技术-影像定位与导航       | positioning and navigation                          | Y        |
| 421 | 机器人共性关键技术-服务机器人关键技术-生             | myogenic                                            | Y        |

| No.                                     | Content                        | Keyword                                | Included |
|-----------------------------------------|--------------------------------|----------------------------------------|----------|
|                                         | 肌电感知与融合                        | electrical<br>perception and<br>fusion |          |
| 422                                     | 机器人共性关键技术-新一代机器人技术-人工智能        | artificial<br>intelligence             | Y        |
| 423                                     | 机器人共性关键技术-新一代机器人技术-机器人深度学习     | deep learning                          | Y        |
| 424                                     | 机器人共性关键技术-新一代机器人技术-机器人通用控制软件平台 | control software<br>platform           | Y        |
| 425                                     | 机器人共性关键技术-新一代机器人技术-人机共存        | man-machine<br>symbiosis               | Y        |
| 426                                     | 机器人共性关键技术-新一代机器人技术-安全控制        | security control                       | Y        |
| 427                                     | 机器人共性关键技术-新一代机器人技术-高集成一体化关节    | joints                                 | Y        |
| 428                                     | 机器人共性关键技术-新一代机器人技术-灵巧手         | dexterous hand                         | Y        |
| 429                                     | 机器人产业标准-机器人用RV减速机通用技术条件        | RV reducer                             | Y        |
| 430                                     | 机器人产业标准-机器人整机电磁兼容技术要求和试验方法     | electromagnetic<br>compatibility       | Y        |
| 431                                     | 机器人产业标准-个人护理机器人安全要求            | personal care<br>safety                | Y        |
| 432                                     | 机器人产业标准-工业机器人编程和操作图形用户接口       | industrial robot<br>programming        | Y        |
| 433                                     | 机器人产业标准-设计平台标准和喷涂机器人系统应用规范     | spraying                               | Y        |
| <b>Plan 5: 关于推进工业机器人产业发展的指导意见(2013)</b> |                                |                                        |          |
| 434                                     | 机器人-工业机器人系统集成技术                | system<br>integration                  | Y        |
| 435                                     | 机器人-主机设计技术                     | host design                            | Y        |
| 436                                     | 机器人-关键零部件制造技术-伺服电机             | servo motor                            | Y        |
| 437                                     | 机器人-关键零部件制造技术-精密减速器            | precision<br>reducer                   | Y        |
| 438                                     | 机器人-关键零部件制造技术-伺服驱动器            | servo driver                           | Y        |
| 439                                     | 机器人-关键零部件制造技术-末端执行器、传感器        | end effector,<br>sensor                | Y        |
| <b>Plan 6: 服务机器人科技发展“十二五”专项规划(2012)</b> |                                |                                        |          |
| 440                                     | 服务机器人集成技术-原型样机集成-关键零部件         | key components                         | Y        |
| 441                                     | 服务机器人集成技术-原型样机集成-可靠性           | reliability                            | Y        |

| No. | Content                      | Keyword                                                            | Included |
|-----|------------------------------|--------------------------------------------------------------------|----------|
| 442 | 服务机器人-设计制造技术-产品设计            | product design                                                     | Y        |
| 443 | 服务机器人-设计制造技术-材料与工艺技术         | materials and process                                              | Y        |
| 444 | 服务机器人-设计制造技术-系统集成水平          | system integration level                                           | Y        |
| 445 | 服务机器人-机器人机构学                 | mechanism                                                          | Y        |
| 446 | 服务机器人-动力学                    | dynamics                                                           | Y        |
| 447 | 服务机器人-环境适应技术                 | environmental adaptation                                           | Y        |
| 448 | 服务机器人-关键部件-驱动器               | driver                                                             | Y        |
| 449 | 服务机器人-关键部件-电机                | motor                                                              | Y        |
| 450 | 服务机器人-关键部件-减速器               | reducer                                                            | Y        |
| 451 | 服务机器人-产业化关键技术-产品创意与性能优化设计技术  | product creation and performance optimization                      | Y        |
| 452 | 服务机器人-产业化关键技术-核心零部件制造技术      | core components manufacturing                                      | Y        |
| 453 | 服务机器人-产业化关键技术-高功率密度能源动力技术    | energy power                                                       | Y        |
| 454 | 服务机器人-产业化关键技术-信息识别与宜人化人机交互技术 | information identification and pleasant human-computer interaction | Y        |
| 455 | 服务机器人-产业化关键技术-人机共存安全技术       | human computer coexistence security                                | Y        |
| 456 | 服务机器人-产业化关键技术-系统集成与应用技术      | integration and application test                                   | Y        |
| 457 | 服务机器人-产业化关键技术-性能测试规范与维护技术    | specification and maintenance technology                           | Y        |
| 458 | 高端仿生技术-仿人形机器人                | humanoid                                                           | Y        |
| 459 | 高端仿生技术-高负载高稳定高速机动仿生骡子        | bionic mules                                                       | Y        |
| 460 | 高端仿生技术-适应多环境的自变形模块化机器人       | self-deforming modular                                             | Y        |

| No.                                                 | Content                            | Keyword                                               | Included |
|-----------------------------------------------------|------------------------------------|-------------------------------------------------------|----------|
| 461                                                 | 微纳系统技术-介入人体或血管的微纳米机器人              | micro-nano                                            | Y        |
| 462                                                 | 微纳系统技术-脑生肌电认知与智能假肢控制技术             | intelligent prosthetics module                        | Y        |
| 463                                                 | 模块标准化平台技术-模块标准化体系结构                | standardized architecture                             | Y        |
| 464                                                 | 模块标准化平台技术-开源机器人控制与软件系统             | open-source robot control and software system         | Y        |
| 465                                                 | 模块标准化平台技术-模块化互换性功能部件（传感器、驱动器、控制器等） | modular interchangeable functional unit               | Y        |
| 466                                                 | 模块标准化平台技术-接口协议                     | Interface Protocol                                    | Y        |
| <b>Plan 7: 科技发展新态势与面向 2020 年的战略选择 (2013)</b>        |                                    |                                                       |          |
| 467                                                 | 智能制造-人-机共融智能制造                     | man-machine integration and intelligent manufacturing | N        |
| <b>Plan 8: 中科院 135 发展规划纲要-科技创新 2030—重大项目 (2016)</b> |                                    |                                                       |          |
| 468                                                 | 智能制造和机器人                           | intelligent manufacturing and robotics                | N        |
| 469                                                 | 人工肌肉                               | artificial muscle                                     | Y        |

### Robustness Checks: On the Characterizing Indicators

We select two technologies from the top significant 150 technologies, namely, *Industrial Robot Programming* and *Artificial Muscles*. We also acquire their historical search data (spans from 2000 to 2016) from *Google* to test the robustness of the proposed indicators. The historical trends of the values of the four indicators of these technologies are calculated and plotted in Fig. S1.

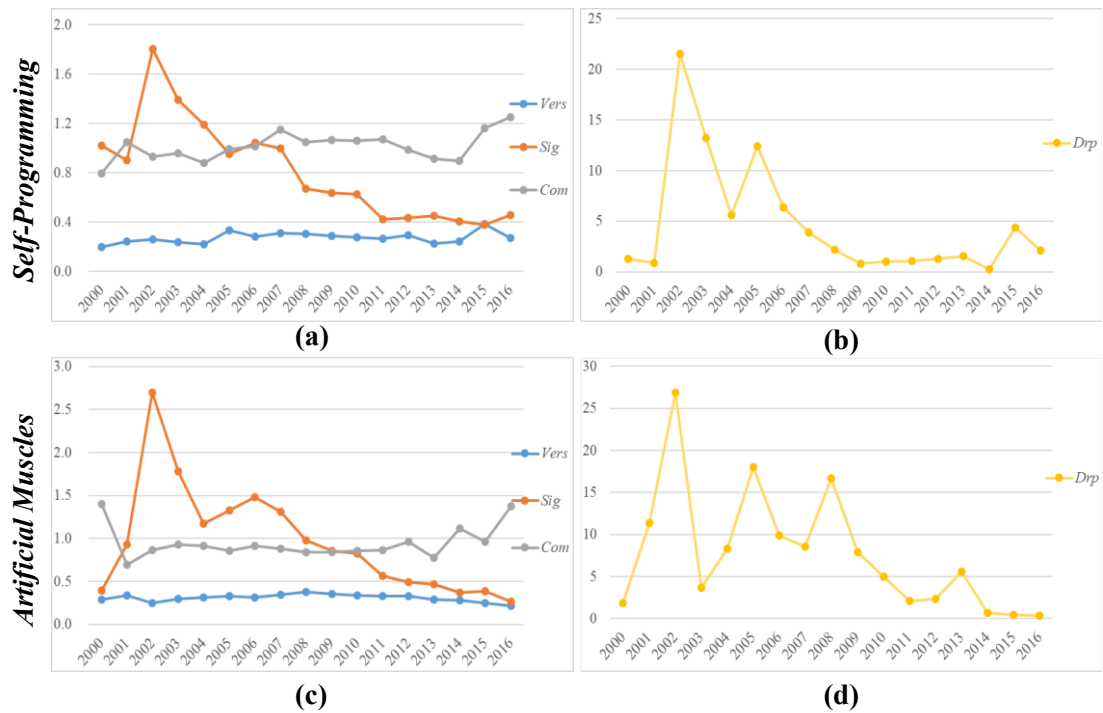

**Fig. S1.** Historical trends of the four indicators of the two selected technologies, i.e., *Industrial Robot Programming* and *Artificial Muscles*.

Figs. S1 (a) and (b) show that the values of the versatility indicator remain low during the studied period of 2000 to 2016, which indicates that *Industrial Robot Programming* can be considered a specialized technology. The technology of *Industrial Robot Programming*, or referred to as *Self-Programming* or *Automatic Programming* in several cases, is essentially based on domain-specific knowledge [1]. Thus, its research and applications are highly specialized. The applications of this technology are mostly concentrated at expression generation [2] and classification [3], [4]. However, several natural language processing technologies can also be applied to perform these tasks. For example, term frequency–inverse document frequency is a frequently used technique for text classification. The limited but non-exclusive potential application scenarios of the technology are consistent with the low values of the commerciality indicator; the value was generally less than 1.2 during the studied period. The values of the significance indicator are correlated with the values of the disruptiveness indicator, and they show a general descending trend. The booming of *Industrial Robot Programming* at the beginning of 21<sup>st</sup> century could probably be attributed to the introduction of declarative languages [5] and higher order logic [6].

The recent spike in the values of the significance, commerciality, and disruptiveness indicators is possibly triggered by the introduction of deep learning [7].

The historical values of the versatility indicator of *Artificial Muscles* are again quite low during the entire studied period, which means that the technology tends to be highly specialized, as shown in Figs. S1 (c) and (d). The development of *Artificial Muscles* was in stagnation for a quite long period without suitable materials that are lightweight and controllable; the advent of electroactive polymers boosts this research nearly instantly [8]. Consequently, the values of the significance and disruptiveness indicators increased sharply at the beginning of this century, as shown in Figs. S1 (c) and (d). The applications of *Artificial Muscles* that are based on electroactive polymers are expanding [9]–[12]; this pattern is consistent with the increasing commerciality values. However, the significance and disruptiveness indicators show descending trends as the technology received less and less attention due to the multiple weaknesses of the materials like short lifespan, high economic cost, and energy consumption [13].

### Robustness Checks: On the Observed Feature Distributions

We also demonstrate that the innovations exhibit similar distributions in altered analytical spaces for checking the robustness of the observed feature distributions. In other words, the outcomes of the measurement should be proven to be constant. To this end, we took a simplified route: we reduce the quantity of the 2D analytical subspaces from 48 ( $6 \times 8$ ) to 35 ( $5 \times 7$ ), 24 ( $4 \times 6$ ), and 15 ( $3 \times 5$ ); then, we examine the distributions of the 452 intelligent robotics technologies. We calculate the values of the four indicators of the total of 452 technologies based on the search results retrieved from *Google*. Thereafter, we plot the results in descending orders in Fig. S2.

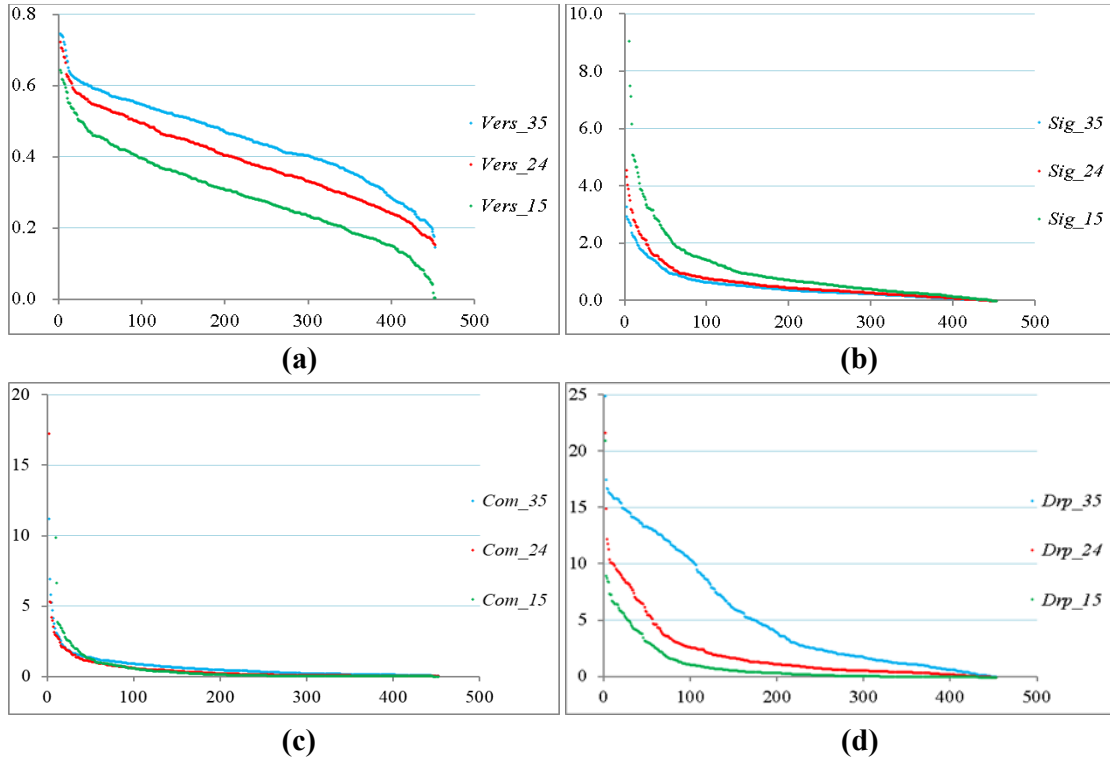

**Fig. S2.** Values of the four indexes of the 452 selected intelligent robotic technologies, and they are plotted in descending orders: (a) *Vers* values; (b) *Sig* values; (c) *Com* values; (d) *Drp* values.

Fig. S2 shows that the distributions of the defined indicators of the 452 technologies are nearly identical to those observed in the previous plots (Figs. 3, 4, 5, and 6). The distortion in the  $Drp_k$  values also persists. The decreasing quantity of the 2D analytical subspaces imparts no observable impacts on the outcomes of the measurement; the findings are highly constant. Therefore, the robustness of the observed distributions is proven, and the pattern of such distributions could pervasively exist in any technological domain.

## Methodological Comparison

To demonstrate the distinctiveness of our online big data-based method from conventional technological assessment approaches, we have plotted the *S-curve* and *Gartner Hype Cycle* for the technologies of *Industrial Robot Programming* and *Artificial Muscles*, in Fig. S3. Following Ernst [14], the *S-curves* are plotted based on the patent application data (spans from 2000 to 2016) from the IncoPat database (<https://www.incopat.com/>). We employ the method proposed by Sasaki [15] to plot the *Gartner Hype Cycles*, in which the news reports from the LexisNexis database are used to form the “Hype Stage” (red-dot lines in Fig. S3 [b] and [d]) [16] and the patent application data from the IncoPat database is used to form the “Implementation Stage” (red-dot lines in Fig. S3 [b] and [d]) [14], [17]. The final *Gartner Hype Cycles* are denoted in the blue curves in Fig. S3 (b) and (d). It worth mentioning that according to Jun [17], [18], news reports can validly represent the expectations on certain technology, which from full of hopes to disappointments.

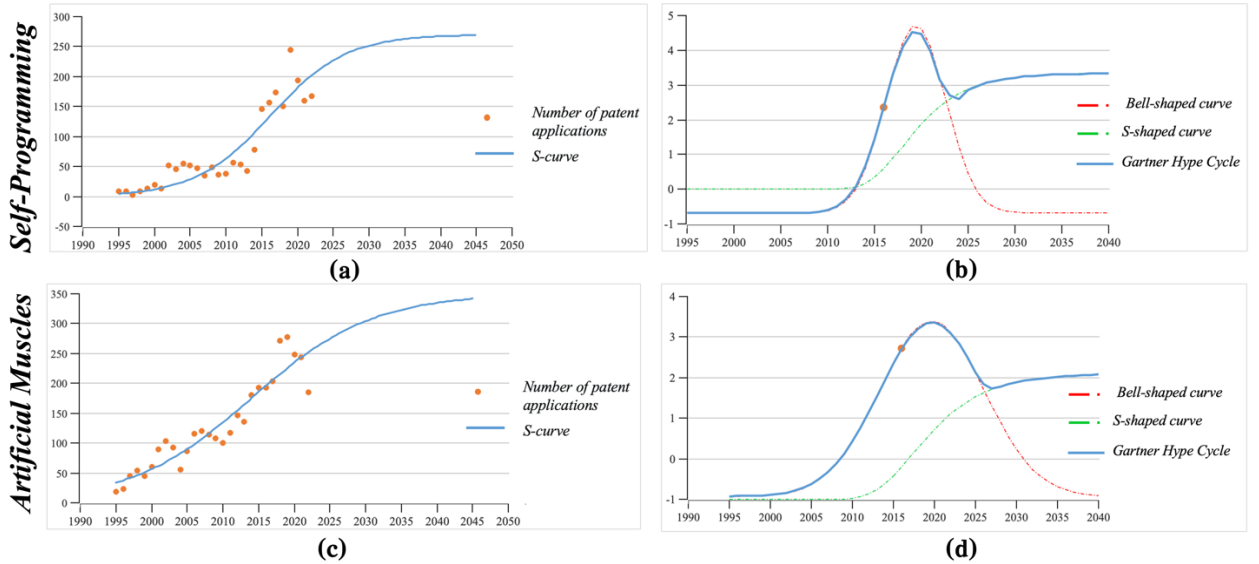

**Fig. S3.** Developmental trends of the two selected technologies, i.e., *Industrial Robot Programming* and *Artificial Muscles*, are plotted using *S-curve* and *Garner Hype Cycle*. (a) *S-curve* of *Self-Programming*; (b) *Garner Hype Cycle* of *Self-Programming*; (c) *S-curve* of *Artificial Muscles*; (d) *Garner Hype Cycle* of *Artificial Muscles*.

Fig. S3 (a) shows that the maturity of *Industrial Robot Programming* was increasing dramatically during the period of 2000 and 2016, while our approach and the above literature analysis contradict the finding; the commercial prospect of this technology has decreased. The *Garner Hype Cycle* (see Fig. S3 [b]) suggests that the development of *Industrial Robot Programming* was slow before 2010. Yet, this observation again contradicts the findings from our approach and literature analysis; the technology enjoyed a rapid development due to the introduction of declarative languages [5] and higher order logic [6], and the technology’s high significance values (see Fig. S1 [a]) are compatible with the outcome of the literature analysis.

The *S-curve* of *Artificial Muscles* (see Fig. S3 [c]) indicates that this technology had a turning point after 2014. However, the aforementioned literature analysis shows that with the emergence of electroactive polymers in the beginning of 21<sup>st</sup> century, this technology experienced a dramatic progress [8]. During 2000 to 2008, the values of commerciality and disruptiveness indicators of *Artificial Muscles* are greater than the averages of the 150 key technologies, indicating that the technology had attracted significant attention in the period. Yet again, the pattern of the *Artificial Muscles*' *S-curve* is not conformed with the literature analysis and the findings of our method.

The *Gartner Hype Cycle* of *Artificial Muscles* (see Fig. S3 [d]) shows that the technology was continuously attracting public attention during the period of 2000 to 2016. However, the observations derived from our approach indicate otherwise; the values of the significance and disruptiveness indicators of this technology are generally decreasing, only the values of the commerciality indicator are increasing around the year of 2016. The literature analysis supports the outcomes of our approach; the slowed development of *Artificial Muscles* is observed in the literature, and this can be possibly attributed to the absence of novel materials other than electroactive polymers.

To conclude, though *S-curve* and *Gartner Hype Cycle* have been extensively applied to technological assessments, their performance is proved to be inferior to our method, and is always deviated from the reality.

## References

- [1] D. R. Barstow, "c," *IEEE Transactions on Software Engineering*, vol. 11, no. 11, pp. 1321-1336, 1985.
- [2] D. Rivero, J. R. Rabunal, J. Dorado, and A. Pazos, "Time series forecast with anticipation using genetic programming," *Computational intelligence and bioinspired systems*, 8th international work-conference on artificial neural networks, Springer, Berlin, Heidelberg, 2005.
- [3] P. Espejo, S. Ventura, and F. Herrera, "A survey on the application of genetic programming to classification," *IEEE Transactions on Systems Man and Cybernetics Part C (Applications and Reviews)*, vol. 40, no. 2, pp. 121-144, 2010.
- [4] L. Guo *et al.*, "Automatic feature extraction using genetic programming: An application to epileptic EEG classification," *Expert Systems with Applications*, vol. 38, no. 8, pp. 10425-10436, 2011.
- [5] F. Bry and S. Schaffert, "Towards a declarative query and transformation language for XML and semistructured data: Simulation unification," *International Conference on Logic Programming*. Springer, Berlin, Heidelberg, 2002.
- [6] M. Hanus and C. Prehofer, "Higher-order narrowing with definitional trees," *J. Funct. Program.*, vol. 9, no. 1, pp. 33-75, 1999.
- [7] B. M. Lake, R. Salakhutdinov, and J. B. Tenenbaum, "Human-level concept learning through probabilistic program induction," *Science*, vol. 350, no. 6266, pp. 1332-1338, 2015.
- [8] Y. Bar-Cohen, "Electroactive polymers as artificial muscles-capabilities, potentials and challenges," *Handbook on Biomimetics*, 2000.
- [9] J. W. Paquette and K. J. Kim, "Ionomeric electroactive polymer artificial muscle for naval applications," *IEEE Journal of Oceanic Engineering*, vol. 29, no. 3, pp. 729-737, 2004.
- [10] F. Carpi, R. D. Kornbluh, P. Sommerlarsen, and G. Alici, "Electroactive polymer actuators as artificial muscles: Are they ready for bioinspired applications," *Bioinspiration Biomimetics*, vol. 6, no. 4, no. 045006, 2011.
- [11] R. F. Shepherd *et al.*, "Multigait soft robot", *Proceedings of the National Academy of Sciences of the United States of America*, vol. 108, no. 51, pp. 20400-20403, 2011.
- [12] S. Chiba *et al.*, "Consistent ocean wave energy harvesting using electroactive polymer (dielectric elastomer) artificial muscle generators," *Applied Energy*, vol. 104, pp. 497-502, 2013.
- [13] C. S. Haines *et al.*, "New twist on artificial muscles," *Proceedings of the National Academy of Sciences of the United States of America*, vol. 113, no. 42, pp. 11709-11716, 2016.
- [14] H. Ernst, "The use of patent data for technological forecasting: The diffusion of CNC-technology in the machine tool industry", *Small Business Economics*, vol. 9, no. 4, pp. 361-381, 1997.
- [15] H. Sasaki, "Simulating Hype Cycle Curves with mathematical functions: Some examples of high-tech trends in Japan", *International Journal of Information Management Technology*, vol. 7, pp. 1-12, 2015.

- [16] H. Jarvenpaa and S. J. Makinen, "Empirically detecting the Hype Cycle with the life cycle indicators: An exploratory analysis of three technologies", in *2008 IEEE International Conference on Industrial Engineering and Engineering Management*, pp. 12-16, 2008.
- [17] S.-P. Jun, "An empirical study of users' hype cycle based on search traffic: the case study on hybrid cars", *Scientometrics*, vol. 91, no. 1, pp. 81-99, 2011.
- [18] S.-P. Jun, "A comparative study of hype cycles among actors within the socio-technical system: With a focus on the case study of hybrid cars", *Technological Forecasting and Social Change*, vol. 79, no. 8, pp. 1413-1430, 2012.
